# Supplementary material for: Green and Reliable Freight Routing Problem in the Road-Rail Intermodal Transportation Network with Uncertain Parameters: A Fuzzy Goal Programming Approach
Source: Hindawi journal article supplement (doi:10.1155/2020/7570686), 2020-02-19
Supplement: f1 [file 7570686.f1.xlsx]

## Sheet: fuzzy simulation
Parameters	Deterministic transportation scenario No.	1	2	3	4	5	6	7	8	9	10	11	12	13	14	15	16	17	18	19	20
Fixed departure times	Train (3, 6) on Day 1	6.47594	6.39168	5.29395	5.28155	5.41643	5.16553	5.20402	5.48167	5.74628	5.64236	5.96992	5.97415	5.48849	5.10531	5.04858	5.03955	5.05973	5	6.5	7
	Train (3, 6) on Day 2	30.1552	29.0687	29.2375	30.0225	30.1876	29.0941	29.2704	29.7069	29.6296	29.5635	29.1309	29.2724	30.3558	29.2893	29.7216	29.1545	29.0372	29	30.5	31
	Train (3, 6) on Day 3	53.3046	53.6596	53.1396	54.4771	53.0312	53.7765	54.3451	53.4062	53.1094	53.5286	54.2048	53.3175	54.3923	53.228	53.0962	53.4731	54.0505	53	54.5	55
	Train (3, 6) on Day 4	77.3042	77.0819	77.0742	78.0708	78.5644	77.184	77.2705	77.8507	77.6033	77.0328	77.0864	77.7717	77.2344	77.6013	77.2601	77.9828	78.3883	77	78.5	79
	Train (3, 7) on Day 1	8.03625	7.61758	7.35854	7.85429	7.50008	7.87704	7.90196	7.31166	7.64886	7.51351	8.20797	7.55224	7.46141	7.29494	7.39469	7.2192	7.7944	7.2	8.4	9
	Train (3, 7) on Day 2	31.3077	32.0163	32.2477	31.4716	31.7893	31.4643	32.1415	31.7059	31.3307	31.2879	31.3913	31.2493	31.4735	31.8963	31.9537	32.3891	31.2968	31.2	32.4	33
	Train (3, 7) on Day 3	56.5682	56.2993	56.148	55.7867	55.252	56.6193	55.4816	56.2433	55.3687	55.9596	55.2576	56.2245	55.6922	55.5318	55.7955	55.305	55.4734	55.2	56.4	57
	Train (3, 7) on Day 4	79.2546	79.5518	79.3295	79.3188	79.2792	79.4994	79.5899	80.149	80.6916	80.3287	79.8903	80.3484	79.5701	80.3459	79.6779	79.9122	80.31	79.2	80.4	81
	Train (4, 6) on Day 1	14.6686	14.0614	14.0649	14.7995	14.5712	15.2308	14.9849	14.4156	14.8532	14.0752	14.2221	14.1417	14.0244	14.2639	14.1076	14.541	14.0111	14	14.6	15.3
	Train (4, 6) on Day 2	38.3342	38.1945	38.4874	38.0037	38.326	38.4494	38.0014	38.1841	38.2814	38.0735	38.3195	38.1651	38.2819	38.0342	38.3207	38.9543	38.6374	38	38.6	39.3
	Train (4, 6) on Day 3	62.0292	62.3495	62.0132	62.3674	62.1074	62.7166	62.0296	63.0481	62.1925	62.2329	62.3238	62.9202	62.3409	63.1628	62.2743	62.0896	63.1832	62	62.6	63.3
	Train (4, 6) on Day 4	86.0058	86.0053	86.2523	86.2984	86.1841	86.4533	86.188	86.2152	86.3065	86.0353	86.4063	86.1355	86.4622	86.9791	86.5359	86.2282	86.3267	86	86.6	87.3
	Train (4, 7) on Day 1	11.3305	11.0016	11.0281	11.7923	11.3323	11.2646	11.4147	11.8589	11.1048	11.0672	11.3015	11.0471	11.4538	11.2266	11.4648	11.048	12.3384	11	11.6	12.5
	Train (4, 7) on Day 2	35.0227	35.2934	35.1309	35.6	36.1628	35.5988	35.439	35.432	35.1915	35.9093	35.29	36.1148	35.4338	35.4734	35.1798	35.6405	35.3584	35	35.6	36.5
	Train (4, 7) on Day 3	59.9131	59.3796	59.0011	59.0173	59.034	60.3458	59.6525	59.0765	59.0803	59.1414	59.3927	59.6616	59.0212	59.1804	59.8753	59.1676	59.7127	59	59.6	60.5
	Train (4, 7) on Day 4	83.3273	83.0094	83.7109	83.2911	83.8316	83.0059	83.6552	83.0424	83.0712	83.0065	83.4205	83.3718	83.3733	83.613	83.6772	83.0043	83.0362	83	83.6	84.5
	Train (5, 6) on Day 1	15.4283	15.0578	15.055	15.5635	15.1333	15.4365	15.3598	15.2472	15.1432	15.1693	15.2883	15.0596	15.4255	15.0271	15.0547	15.4502	15.3163	15	15.3	15.8
	Train (5, 6) on Day 2	39.3562	39.0932	39.0106	39.4141	39.0676	39.2774	39.1001	39.5042	39.3161	39.7122	39.1353	39.391	39.0568	39.5173	39.181	39.3814	39.4137	39	39.3	39.8
	Train (5, 6) on Day 3	63.0474	63.1782	63.0264	63.1106	63.4476	63.4157	63.3294	63.0504	63.0983	63.0882	63.0391	63.0114	63.0008	63.4713	63.4006	63.2748	63.0221	63	63.3	63.8
	Train (5, 6) on Day 4	87.1594	87.1155	87.0551	87.0234	87.0341	87.2895	87.2793	87.0273	87.2272	87.3001	87.3972	87.3389	87.1541	87.2957	87.3784	87.1842	87.2882	87	87.3	87.8
	Train (5, 7) on Day 1	87.1594	9.64725	10.1651	10.2815	9.68724	9.8645	9.80913	10.2567	9.84115	9.6589	9.64111	9.61414	9.68162	9.6044	9.68098	9.76935	9.87191	9.6	10.3	10.5
	Train (5, 7) on Day 2	87.1594	33.8094	33.6352	33.884	33.9891	33.6319	33.6177	33.8055	33.6039	33.6659	33.892	33.7463	33.9256	33.6221	33.6068	34.0408	33.6691	33.6	34.3	34.5
	Train (5, 7) on Day 3	87.1594	57.9958	58.1812	58.3684	57.6016	57.6388	57.7864	57.6377	57.8583	57.6164	57.6808	57.8042	57.6382	57.6125	58.0221	58.3809	57.6494	57.6	58.3	58.5
	Train (5, 7) on Day 4	87.1594	81.7777	81.6469	81.701	81.7554	81.8232	82.1591	81.6897	81.6335	81.7434	82.1872	81.9301	81.6832	81.6244	81.7146	81.6336	82.1753	81.6	82.3	82.5
Capacities in TEU	Train (3, 6) on Day 1	87.1594	86.3949	88.3573	97.2932	88.715	92.3846	86.7703	89.2027	97.2321	90.2408	86.0005	87.5276	86.2589	86.7829	86.075	86.8439	91.7293	86	93	100
	Train (3, 6) on Day 2	87.1594	88.8909	86.4111	87.2482	90.0102	87.5608	94.092	88.2635	86.3963	94.7508	93.3437	91.8423	86.6108	89.2537	95.9838	91.6697	86.3547	86	93	100
	Train (3, 6) on Day 3	87.1594	89.7768	91.5367	87.2969	87.0368	86.3306	86.1229	86.5887	90.3801	93.266	87.7326	91.0848	87.8452	91.674	88.1406	90.392	86.4158	86	93	100
	Train (3, 6) on Day 4	87.1594	90.9053	87.3414	95.4216	87.7913	88.0319	91.3534	87.2126	94.8306	91.8949	92.5443	94.8193	91.1304	87.7425	89.8607	94.997	86.6283	86	93	100
	Train (3, 7) on Day 1	87.1594	80.5171	79.9545	85.1554	90.0822	83.7891	82.0803	83.0172	79.519	85.8224	78.2752	81.721	83.2575	78.0878	79.7625	80.7941	85.1559	78	85	94
	Train (3, 7) on Day 2	87.1594	85.5266	81.8475	79.7941	80.4471	78.2912	78.0699	79.0546	86.3728	78.3585	78.3146	87.0067	78.1457	78.2746	78.8546	86.9426	80.7005	78	85	94
	Train (3, 7) on Day 3	87.1594	78.6067	85.0673	82.0635	83.4455	78.795	79.463	81.6894	81.629	82.1583	78.0236	85.9265	82.9364	82.1211	89.7538	78.7231	84.6983	78	85	94
	Train (3, 7) on Day 4	87.1594	82.9523	79.6053	81.1071	84.4506	85.1023	81.5016	86.199	87.3224	86.098	81.1347	78.6035	81.2759	83.1245	87.2702	87.6814	79.9905	78	85	94
	Train (4, 6) on Day 1	87.1594	86.5838	83.9758	88.6125	82.5627	82.5918	83.4884	85.6041	88.6016	82.9051	82.2944	84.4564	91.9358	83.3287	82.4427	83.2326	82.9052	82	89	95
	Train (4, 6) on Day 2	87.1594	86.8977	86.0961	83.9346	83.0891	87.7276	82.4371	86.0861	83.9828	84.3439	85.4243	90.4141	84.8947	82.0618	82.5203	82.2825	83.955	82	89	95
	Train (4, 6) on Day 3	87.1594	82.3008	82.0397	90.2879	82.4821	83.9587	87.0793	83.5746	83.8542	85.8789	82.7931	87.0354	88.1956	92.6344	86.2886	85.5296	82.1221	82	89	95
	Train (4, 6) on Day 4	87.1594	82.3345	84.6983	85.8466	83.3356	86.8813	82.7874	85.8576	85.735	86.5589	89.3237	84.0027	88.345	84.9614	83.589	82.2057	87.5755	82	89	95
	Train (4, 7) on Day 1	87.1594	93.3516	95.1415	91.1442	96.1784	90.8648	91.8873	95.6177	91.1787	95.6054	101.568	94.8344	93.5802	92.7025	90.5392	94.2255	90.1447	90	94	102
	Train (4, 7) on Day 2	87.1594	98.6417	96.9606	91.0126	97.841	94.163	90.9842	91.4195	90.2847	90.8665	95.4581	100.317	91.2092	91.5886	91.5484	95.6066	91.3383	90	94	102
	Train (4, 7) on Day 3	87.1594	90.32	90.9453	93.6854	95.3797	96.2337	98.3779	90.0145	93.6476	90.2127	91.947	92.4549	96.2118	90.2699	94.7648	90.8046	93.0073	90	94	102
	Train (4, 7) on Day 4	87.1594	90.5915	91.1794	92.4622	93.353	95.6721	96.1784	94.9944	96.7585	90.3604	90.0051	94.6226	99.3139	90.7616	93.059	90.5165	92.8747	90	94	102
	Train (5, 6) on Day 1	87.1594	98.3505	92.8827	103.738	105.064	90.2521	99.7002	90.6703	103.577	91.2745	93.9341	106.456	94.9279	91.8179	92.6478	96.9976	91.8547	90	98	110
	Train (5, 6) on Day 2	87.1594	99.9541	101.913	92.235	100.315	93.3331	90.7922	91.5528	94.8187	99.1156	90.058	105.385	92.2613	90.0581	97.2004	91.1612	91.5808	90	98	110
	Train (5, 6) on Day 3	87.1594	91.0431	92.1586	90.2762	90.3132	97.4049	96.3994	93.5054	92.1776	94.9987	92.1887	96.8115	94.4334	92.1998	90.2384	90.2986	92.5162	90	98	110
	Train (5, 6) on Day 4	87.1594	90.2331	97.3531	90.0705	99.5702	90.9676	98.5005	101.642	91.5091	92.0776	104.044	99.9064	94.1019	96.1862	101.894	94.7661	94.5554	90	98	110
	Train (5, 7) on Day 1	87.1594	89.9667	94.4521	89.1258	91.1098	92.3053	91.0435	89.8109	90.8836	89.0182	96.3494	90.5822	89.0604	90.6656	89.0581	91.8045	90.5169	89	95	98
	Train (5, 7) on Day 2	87.1594	91.3806	90.5397	96.5345	89.1202	92.435	89.7222	93.811	95.9767	89.939	90.7483	91.4264	89.0357	91.2458	93.4715	91.0063	91.0947	89	95	98
	Train (5, 7) on Day 3	87.1594	93.3304	90.4902	93.9662	90.106	89.3417	89.2236	89.2519	89.2684	89.6766	92.9934	89.9746	91.5182	89.1273	89.2046	90.67	90.8084	89	95	98
	Train (5, 7) on Day 4	87.1594	89.0583	89.0472	90.2797	90.0102	93.5104	89.567	91.1846	90.4207	92.921	92.9571	89.3611	92.5849	89.8577	89.1724	89.1346	89.7298	89	95	98
	Truck fleet group (1, 3)	87.1594	46.0652	57.193	46.2612	45.7733	51.5389	56.7406	50.0537	54.0603	57.5421	46.645	45.2803	47.1219	54.6324	51.1074	45.9943	60.1813	45	50	65
	Truck fleet group (1, 4)	87.1594	64.9617	69.5154	64.6873	65.3915	60.9126	69.4294	60.2838	60.2757	61.3459	62.1515	66.6261	67.8189	63.7379	63.2265	67.1108	61.5138	60	67	73
	Truck fleet group (1, 5)	87.1594	59.5777	56.7004	62.5332	57.6049	65.6278	58.2838	55.5439	64.4835	56.0511	55.1726	60.0845	55.2045	59.2565	55.1896	66.4436	60.2514	55	64	70
	Truck fleet group (1, 8)	87.1594	59.5594	55.2348	57.8423	63.3141	55.718	64.0959	62.7	64.8005	59.4149	64.2199	68.0112	56.6721	55.7059	56.6742	57.9994	60.5255	55	67	71
	Truck fleet group (1, 9)	87.1594	59.7544	56.2407	56.9259	58.95	52.7633	53.1877	52.565	50.4338	51.5685	62.8167	54.6119	55.8143	51.1431	51.4489	56.972	50.7718	50	54	63
	Truck fleet group (2, 3)	87.1594	47.4167	45.4562	50.5322	53.9697	46.9946	43.177	47.0282	47.2886	44.4673	50.6265	43.0124	46.7573	43.9146	46.8805	45.4377	43.7705	43	48	58
	Truck fleet group (2, 4)	87.1594	49.5431	51.1027	49.1006	50.3937	51.916	49.1715	51.085	48.4144	48.5014	51.3496	48.6909	52.7451	54.8805	49.5434	54.5566	48.6578	48	55	60
	Truck fleet group (2, 5)	87.1594	52.6382	51.464	53.9851	48.975	53.3504	49.1782	45.3714	50.2111	45.455	45.0226	48.7713	46.7904	45.0675	47.1636	55.2366	51.9654	45	54	60
	Truck fleet group (2, 8)	87.1594	42.184	50.1319	45.9957	52.4296	44.9869	47.0854	42.0284	43.3127	40.3656	40.3772	48.8667	40.4459	40.9171	47.6668	46.9692	43.8559	40	55	64
	Truck fleet group (2, 9)	87.1594	60.1797	64.3004	56.481	55.3767	65.3753	55.5756	64.1693	55.6656	59.913	55.8447	56.6698	65.6972	57.48	56.5237	64.0548	55.1589	55	67	72
	Truck fleet group (6, 8)	87.1594	57.2646	57.0115	57.6667	55.3879	56.7519	56.355	58.202	56.3527	61.957	58.043	55.4105	61.5594	60.1772	58.3152	55.5902	55.9132	55	58	64
	Truck fleet group (6, 9)	87.1594	48.201	52.6856	53.2664	59.7625	48.3256	57.7057	51.6756	49.8	60.4378	48.2735	49.2381	54.6512	50.1478	52.7476	48.1202	50.0272	48	54	68
	Truck fleet group (7, 8)	87.1594	55.0408	50.1588	54.495	50.095	51.2789	57.0679	50.0254	53.6671	50.2896	50.105	51.1326	50.0193	59.8392	53.1247	51.2377	50.5233	50	60	65
	Truck fleet group (7, 9)	87.1594	60.8037	62.9568	63.2836	60.0121	66.5391	60.1763	61.4625	68.1872	60.0388	60.0513	64.0743	62.1247	61.656	62.4252	65.6408	61.6562	60	67	71
Travel times in hour	Train (3, 6) on Day 1	87.1594	5.21531	5.1289	5.33	4.91455	4.98393	5.05061	4.84074	4.59388	5.77107	4.74364	5.16827	4.65874	5.60862	5.39701	4.6367	4.69627	4.5	5.2	6
	Train (3, 6) on Day 2	87.1594	5.10902	4.88102	4.84562	4.53223	4.72796	4.73775	4.78566	4.52712	5.20106	4.58328	4.72399	4.91438	4.5654	4.84641	5.18844	4.74785	4.5	5.2	6
	Train (3, 6) on Day 3	87.1594	5.8039	4.62539	4.51727	4.58118	4.51783	4.51704	4.69816	5.24109	5.61443	5.38316	4.68333	4.67007	5.34502	4.68933	4.50424	4.63054	4.5	5.2	6
	Train (3, 6) on Day 4	87.1594	5.29521	4.67342	4.52027	5.58185	4.66927	4.98798	4.7374	5.29864	4.58971	5.42322	5.08717	4.82689	4.69332	4.50089	5.0208	4.99211	4.5	5.2	6
	Train (3, 7) on Day 1	87.1594	6.52895	6.52663	6.63506	6.34002	6.36129	6.64895	6.52312	6.84058	7.20266	6.83602	6.33567	7.04263	6.78233	6.53995	6.59254	6.57896	6.2	6.2	7.5
	Train (3, 7) on Day 2	87.1594	6.34753	6.51306	6.2908	6.73182	6.78295	7.26475	6.40949	6.29007	6.6456	6.8035	7.29005	6.25308	6.514	7.03641	6.20552	6.97837	6.2	6.2	7.5
	Train (3, 7) on Day 3	87.1594	6.8314	7.14765	6.24363	6.58334	6.72933	7.08909	6.3891	6.21436	6.50627	6.48152	7.06273	6.66816	6.27603	6.42338	6.33058	7.0329	6.2	6.2	7.5
	Train (3, 7) on Day 4	87.1594	6.38796	6.60517	6.20389	6.35032	6.22201	7.23838	6.76177	6.26649	6.61318	7.00534	7.00879	6.45248	7.07319	6.86736	6.29362	6.28491	6.2	6.2	7.5
	Train (4, 6) on Day 1	87.1594	6.58884	7.01857	7.37347	7.15134	6.98938	6.91707	6.52932	7.6351	6.5724	7.16997	6.63909	6.5027	6.67621	7.17383	7.32753	7.26028	6.5	6.5	8.2
	Train (4, 6) on Day 2	87.1594	7.60505	6.69089	6.64348	6.6927	7.42693	6.52303	6.57984	7.53451	7.67308	6.69318	6.57449	6.51459	6.58584	6.81734	8.04548	6.66702	6.5	6.5	8.2
	Train (4, 6) on Day 3	87.1594	7.26015	7.84856	6.59494	6.94765	6.50189	6.9353	6.53197	6.84415	6.51576	6.93541	7.27053	6.72992	6.87888	6.58037	7.20999	7.69937	6.5	6.5	8.2
	Train (4, 6) on Day 4	87.1594	6.51675	6.5793	6.50435	6.71185	6.61604	7.49519	6.6226	6.738	6.80242	6.63883	7.33805	6.50876	6.81868	6.85893	7.0744	6.69332	6.5	6.5	8.2
	Train (4, 7) on Day 1	87.1594	5.01781	4.66622	5.37811	4.61436	4.64338	4.72268	4.74771	4.66721	4.61712	4.94705	5.09096	5.48472	4.71622	4.60187	4.78892	4.92256	4.6	4.6	5.6
	Train (4, 7) on Day 2	87.1594	4.71565	4.61243	4.7371	4.96023	4.7073	4.75447	5.1792	4.97518	5.05419	4.75335	4.8708	5.02658	4.65071	4.62918	4.80346	4.64635	4.6	4.6	5.6
	Train (4, 7) on Day 3	87.1594	4.61967	5.0729	4.8974	4.67688	4.65796	5.05116	5.46703	5.03346	4.6998	5.22324	4.88639	5.50328	4.6721	4.7339	4.61895	4.67757	4.6	4.6	5.6
	Train (4, 7) on Day 4	87.1594	4.62425	4.6863	4.65489	4.71859	5.1993	4.76977	4.60128	5.39041	4.81601	4.65064	4.62688	4.62947	4.76977	5.08637	4.7901	4.90663	4.6	4.6	5.6
	Train (5, 6) on Day 1	87.1594	5.82529	5.80762	5.96054	5.83718	6.13585	5.90587	5.80462	6.02756	6.00755	6.17557	6.60815	5.81804	5.84058	5.91682	5.81999	5.82771	5.8	5.8	6.8
	Train (5, 6) on Day 2	87.1594	5.80806	6.37925	6.21504	6.07732	5.8778	5.99603	6.11209	6.10812	6.40079	6.11029	6.0355	6.29551	6.08348	5.80232	5.90318	5.90812	5.8	5.8	6.8
	Train (5, 6) on Day 3	87.1594	5.95181	6.2042	6.1795	6.42323	5.81906	6.19598	6.45174	6.07933	6.01479	5.81875	6.07607	5.95215	5.96622	5.81673	6.18612	6.32259	5.8	5.8	6.8
	Train (5, 6) on Day 4	87.1594	6.06743	6.46873	6.17668	5.97409	5.85789	6.00802	5.84016	5.80772	6.12955	5.87872	5.86519	5.91874	6.33976	5.8282	6.02415	5.95496	5.8	5.8	6.8
	Train (5, 7) on Day 1	87.1594	6.86077	7.02302	6.93853	6.94495	7.01896	6.91515	7.14333	6.97347	6.87008	6.80142	7.09169	6.91239	6.96942	6.81082	6.80161	7.04185	6.8	6.8	7.8
	Train (5, 7) on Day 2	87.1594	7.03622	7.001	6.84581	7.31181	6.9143	7.02943	7.43503	7.53599	6.81801	6.80734	7.13683	7.01249	7.12452	6.89385	6.80509	7.10334	6.8	6.8	7.8
	Train (5, 7) on Day 3	87.1594	7.16176	7.04804	6.92049	6.85412	7.45442	7.13059	6.81906	6.83701	6.82392	6.84757	7.2169	7.10338	6.82136	6.81376	7.06752	6.99397	6.8	6.8	7.8
	Train (5, 7) on Day 4	87.1594	6.99525	7.12199	6.95749	7.17574	7.03967	7.01143	6.96133	7.35693	6.92229	6.80287	7.09188	7.44676	6.86608	6.82628	7.39201	6.8633	6.8	6.8	7.8
	Truck fleet group (1, 3)	87.1594	3.22402	3.26764	3.25838	3.40812	3.60901	3.28639	3.90351	3.8382	3.2077	3.43607	4.25572	3.83301	3.94789	4.58394	3.33188	3.98084	3.2	5.3	4.8
	Truck fleet group (1, 4)	87.1594	4.94813	4.94166	4.432	5.40998	4.33361	4.88886	4.51764	5.54724	4.31533	4.66257	5.22436	4.32979	4.4011	4.21825	4.38944	5.14955	4.2	5	6.3
	Truck fleet group (1, 5)	87.1594	12.3676	10.2507	8.78868	11.4731	9.18553	9.31717	8.68809	9.40573	13.6683	9.36893	12.3376	9.5703	11.1967	8.82226	9.67026	10.4682	8.5	10	14.2
	Truck fleet group (1, 8)	87.1594	14.9855	15.3011	16.0314	14.7653	18.0648	21.9749	14.6262	17.6808	14.8896	19.9779	14.7203	14.594	14.8534	16.8168	14.8371	16.7678	14.5	18	23.4
	Truck fleet group (1, 9)	87.1594	26.5326	20.6309	18.7772	18.6409	20.2647	23.5053	20.08	22.6599	18.6766	19.1778	18.5025	23.622	19.002	18.6639	22.1072	21.5689	18.5	24.4	28
	Truck fleet group (2, 3)	87.1594	9.13824	8.5476	8.50201	8.65597	8.90603	8.6534	11.0188	8.84488	11.4634	9.53297	12.4177	11.3092	14.1592	9.45007	9.25947	8.70323	8.5	12.2	15.5
	Truck fleet group (2, 4)	87.1594	6.03103	11.3331	6.28647	6.61868	9.44073	9.15154	6.4108	6.31827	9.15532	6.28338	7.11931	8.58184	6.2066	8.75308	6.25756	8.98806	6	10.4	13.5
	Truck fleet group (2, 5)	87.1594	4.70481	5.11265	4.69098	4.86096	5.87668	4.77879	5.16101	5.10336	4.50816	4.551	4.69681	4.86271	4.55727	4.81179	5.51943	4.97066	4.5	5.3	6.8
	Truck fleet group (2, 8)	87.1594	23.2367	20.8853	22.3154	20.6045	22.1642	20.3564	20.3468	23.5457	20.3746	23.5495	26.1538	22.7301	21.4918	21.3942	20.3627	23.0179	20.3	25.5	30
	Truck fleet group (2, 9)	87.1594	21.7016	20.5252	19.8392	20.1913	19.3016	18.8438	21.6852	19.5764	23.7029	19.7183	20.3633	18.5269	20.3881	18.9972	18.9136	20.0605	18.5	22	25.3
	Truck fleet group (6, 8)	87.1594	5.81033	5.7939	5.55965	6.52588	5.93223	6.1358	5.73894	6.60737	6.68069	6.27377	6.63691	6.55556	5.77536	6.29701	5.58889	5.93009	5.5	6.7	7.5
	Truck fleet group (6, 9)	87.1594	3.78782	3.76131	3.63988	3.98864	3.7899	4.39679	4.51537	4.05823	3.92773	4.1267	3.88507	3.81832	3.6909	4.44246	3.74794	3.63316	3.6	4.5	5.2
	Truck fleet group (7, 8)	87.1594	7.78047	7.68251	8.84628	7.88924	7.70656	7.61014	9.08278	7.6295	7.68326	7.9166	7.76531	7.80443	8.39933	7.76471	8.19031	7.74563	7.6	8.8	9.3
	Truck fleet group (7, 9)	87.1594	3.26345	2.67755	3.46015	3.40267	2.5002	3.17614	2.53124	2.78894	3.09113	3.44262	2.75471	2.78386	2.66796	3.05794	3.03174	2.89522	2.5	3	4.5
Separate loading and unloading times in hour per TEU	Train (3, 6) on Day 1	87.1594	0.061932	0.0930508	0.0620464	0.0659016	0.0979702	0.0899519	0.0950592	0.0693521	0.0728162	0.0516989	0.0637063	0.118535	0.108312	0.0836664	0.109344	0.0513453	0.05	0.1	0.15
	Train (3, 6) on Day 2	87.1594	0.112507	0.0560667	0.0584568	0.0707128	0.0618495	0.108139	0.0666716	0.0680759	0.0524058	0.0727579	0.0500218	0.0674951	0.0566942	0.0707105	0.0562048	0.0582097	0.05	0.1	0.15
	Train (3, 6) on Day 3	87.1594	0.0564057	0.0962384	0.0844635	0.124046	0.123473	0.0566077	0.0873564	0.0727767	0.0713376	0.0764189	0.0850189	0.0510866	0.0886095	0.0527414	0.0511276	0.0545613	0.05	0.1	0.15
	Train (3, 6) on Day 4	87.1594	0.0675275	0.0539685	0.105398	0.0527187	0.0704396	0.0719977	0.118592	0.0602375	0.0615214	0.0695401	0.0602598	0.110767	0.0619535	0.0529725	0.103228	0.0770908	0.05	0.1	0.15
	Train (3, 7) on Day 1	87.1594	0.0689129	0.0716414	0.0696747	0.1016	0.0848687	0.0846467	0.0983022	0.0858305	0.0502397	0.0573902	0.074595	0.0578099	0.059452	0.0557685	0.0737461	0.0722782	0.05	0.1	0.15
	Train (3, 7) on Day 2	87.1594	0.0927305	0.0894156	0.0900085	0.0880638	0.101431	0.0746347	0.0883985	0.0509372	0.0618238	0.099226	0.077761	0.0561037	0.0514313	0.0554079	0.0504954	0.0681186	0.05	0.1	0.15
	Train (3, 7) on Day 3	87.1594	0.104892	0.0553644	0.0881482	0.0612357	0.0785886	0.0864358	0.122098	0.112465	0.0523837	0.112853	0.0538211	0.0578672	0.122154	0.0801128	0.0780445	0.0519806	0.05	0.1	0.15
	Train (3, 7) on Day 4	87.1594	0.0610003	0.11547	0.0563172	0.0531261	0.0734687	0.0664668	0.058906	0.117102	0.0609234	0.0626778	0.0747812	0.0728718	0.0952422	0.0716561	0.0641183	0.0542866	0.05	0.1	0.15
	Train (4, 6) on Day 1	87.1594	0.0528515	0.0821327	0.0721542	0.0906664	0.0542583	0.0708746	0.05416	0.0628866	0.087941	0.0937035	0.0956295	0.103842	0.0504401	0.0729779	0.0709584	0.0829474	0.05	0.1	0.15
	Train (4, 6) on Day 2	87.1594	0.0517326	0.0972307	0.0651897	0.0959924	0.0888035	0.0735365	0.0779541	0.0601835	0.0742192	0.0679502	0.0932656	0.121057	0.0797741	0.0788401	0.054653	0.0655923	0.05	0.1	0.15
	Train (4, 6) on Day 3	87.1594	0.0505867	0.0798641	0.0537483	0.0818298	0.0654781	0.0822847	0.090351	0.0588374	0.0663116	0.110636	0.0713198	0.071788	0.0617391	0.0741936	0.122393	0.0585942	0.05	0.1	0.15
	Train (4, 6) on Day 4	87.1594	0.0518362	0.0678083	0.126604	0.0715914	0.102371	0.0527059	0.0716811	0.0539295	0.141008	0.053074	0.0558536	0.0518508	0.0631623	0.053583	0.0558622	0.0670777	0.05	0.1	0.15
	Train (4, 7) on Day 1	87.1594	0.0546367	0.0681505	0.0563357	0.0593634	0.0961753	0.0802049	0.0996433	0.0689973	0.0898876	0.0507359	0.0716394	0.0734874	0.0523071	0.0700966	0.0804686	0.0589715	0.05	0.1	0.15
	Train (4, 7) on Day 2	87.1594	0.0598747	0.0772825	0.0500379	0.0510423	0.0961161	0.0598989	0.110644	0.053548	0.0669428	0.0745542	0.0892467	0.113738	0.0510423	0.0745334	0.0546666	0.0501679	0.05	0.1	0.15
	Train (4, 7) on Day 3	87.1594	0.0513824	0.0842053	0.0839552	0.0786988	0.053241	0.136408	0.0648104	0.076721	0.0585489	0.050965	0.0522245	0.0503752	0.0526993	0.0548664	0.0592646	0.0679276	0.05	0.1	0.15
	Train (4, 7) on Day 4	87.1594	0.0980513	0.0774594	0.0644191	0.0716467	0.0778788	0.104338	0.0638889	0.0568113	0.10389	0.0714182	0.0952598	0.0884204	0.0764202	0.0602443	0.116286	0.0863926	0.05	0.1	0.15
	Train (5, 6) on Day 1	87.1594	0.056285	0.053046	0.093919	0.0578777	0.0646195	0.0561339	0.0737053	0.0581604	0.0515131	0.0662852	0.0585976	0.0583191	0.0764883	0.10068	0.0690943	0.0592902	0.05	0.1	0.15
	Train (5, 6) on Day 2	87.1594	0.0558263	0.0686538	0.0579542	0.0547593	0.0538785	0.102065	0.0856124	0.054285	0.0717439	0.0508576	0.0657986	0.0760851	0.0958824	0.116835	0.0951066	0.0804307	0.05	0.1	0.15
	Train (5, 6) on Day 3	87.1594	0.0599392	0.0944152	0.0531999	0.0636575	0.0820785	0.0743492	0.0523283	0.115457	0.0650157	0.0513105	0.0516887	0.130132	0.0692021	0.104792	0.102635	0.0591551	0.05	0.1	0.15
	Train (5, 6) on Day 4	87.1594	0.0500501	0.0531407	0.0633224	0.100186	0.0890877	0.084514	0.0665607	0.0706142	0.0695038	0.115996	0.0562407	0.0512217	0.0780433	0.123939	0.0810629	0.0815806	0.05	0.1	0.15
	Train (5, 7) on Day 1	87.1594	0.0817486	0.060873	0.0678312	0.0510059	0.0551125	0.0735303	0.0520093	0.0575122	0.110644	0.138145	0.0520881	0.0554176	0.0775717	0.0774671	0.0611033	0.0634117	0.05	0.1	0.15
	Train (5, 7) on Day 2	87.1594	0.105263	0.0741022	0.0648716	0.0576611	0.0720963	0.143372	0.0650788	0.053244	0.0736822	0.0944516	0.0560697	0.0610396	0.140469	0.0540381	0.0608309	0.0740135	0.05	0.1	0.15
	Train (5, 7) on Day 3	87.1594	0.0885512	0.0615269	0.0855946	0.115731	0.0789484	0.0952466	0.0567353	0.0523819	0.0702555	0.0583217	0.0613195	0.0506547	0.0515419	0.059337	0.0767903	0.0751356	0.05	0.1	0.15
	Train (5, 7) on Day 4	87.1594	0.0548052	0.0715377	0.106211	0.0505486	0.0572456	0.0541204	0.0566477	0.0620198	0.0633206	0.0730708	0.0736303	0.0627466	0.0700576	0.0530751	0.0513031	0.0523422	0.05	0.1	0.15
	Truck fleet group (1, 3)	87.1594	0.167587	0.136997	0.103846	0.127995	0.103433	0.15774	0.129524	0.185626	0.101263	0.115237	0.100046	0.136636	0.158457	0.137414	0.136636	0.163513	0.1	0.2	0.25
	Truck fleet group (1, 4)	87.1594	0.110542	0.123808	0.174098	0.19462	0.121877	0.14238	0.155407	0.120645	0.114884	0.129945	0.100117	0.103067	0.10329	0.121633	0.141028	0.102114	0.1	0.2	0.25
	Truck fleet group (1, 5)	87.1594	0.206718	0.106173	0.140763	0.139119	0.171274	0.112588	0.182345	0.160871	0.110317	0.155249	0.113194	0.179231	0.144024	0.188454	0.177941	0.175553	0.1	0.2	0.25
	Truck fleet group (1, 8)	87.1594	0.100561	0.158684	0.101004	0.12739	0.122536	0.162375	0.118711	0.109373	0.138068	0.152343	0.114493	0.117761	0.112045	0.103932	0.147691	0.103563	0.1	0.2	0.25
	Truck fleet group (1, 9)	87.1594	0.212928	0.13359	0.125419	0.117539	0.135675	0.138388	0.183767	0.126207	0.120826	0.186282	0.175614	0.128551	0.115384	0.164175	0.215801	0.121777	0.1	0.2	0.25
	Truck fleet group (2, 3)	87.1594	0.114319	0.100242	0.105379	0.191398	0.11643	0.103238	0.155862	0.130009	0.105935	0.104398	0.193741	0.207842	0.131044	0.15662	0.162128	0.113531	0.1	0.2	0.25
	Truck fleet group (2, 4)	87.1594	0.111292	0.122592	0.154668	0.183862	0.110974	0.13064	0.201781	0.146989	0.105768	0.10355	0.101788	0.16372	0.112296	0.118478	0.110282	0.183412	0.1	0.2	0.25
	Truck fleet group (2, 5)	87.1594	0.173469	0.104913	0.109051	0.128481	0.132737	0.101792	0.187863	0.159937	0.207303	0.111476	0.111746	0.14744	0.139108	0.18835	0.103874	0.192499	0.1	0.2	0.25
	Truck fleet group (2, 8)	87.1594	0.126067	0.107574	0.108556	0.112616	0.117155	0.23937	0.156095	0.20022	0.194085	0.162508	0.172837	0.100755	0.133741	0.159535	0.180676	0.146998	0.1	0.2	0.25
	Truck fleet group (2, 9)	87.1594	0.226216	0.116135	0.101012	0.144726	0.107834	0.163912	0.109883	0.154513	0.121238	0.106661	0.109811	0.211936	0.122277	0.136435	0.123168	0.140641	0.1	0.2	0.25
	Truck fleet group (6, 8)	87.1594	0.120293	0.155666	0.127881	0.160156	0.113936	0.201813	0.133062	0.122005	0.12812	0.101206	0.104795	0.148637	0.125334	0.100128	0.133866	0.114528	0.1	0.2	0.25
	Truck fleet group (6, 9)	87.1594	0.170799	0.137796	0.105244	0.144237	0.118205	0.100127	0.166661	0.127459	0.149718	0.186339	0.104445	0.132471	0.143142	0.157386	0.131708	0.110344	0.1	0.2	0.25
	Truck fleet group (7, 8)	87.1594	0.102678	0.156089	0.121318	0.182194	0.100138	0.13866	0.168957	0.20463	0.10676	0.102297	0.177291	0.12559	0.105687	0.227931	0.116646	0.157791	0.1	0.2	0.25
	Truck fleet group (7, 9)	87.1594	0.111979	0.102496	0.223284	0.125796	0.148304	0.120851	0.223401	0.217082	0.117164	0.134108	0.111276	0.103135	0.136399	0.116248	0.110698	0.208784	0.1	0.2	0.25
